# Supplementary material for: Association of Work Environment With Missed and Rushed Care Tasks Among Care Aides in Nursing Homes
Source: PubMed Central journal article supplement (PMC6991287; doi:10.1001/jamanetworkopen.2019.20092), 2020-01-29
Supplement: jamanetwopen-3-e1920092-s001.pdf [file jamanetwopen-3-e1920092-s001.pdf]

## Supplementary Online Content

Song Y, Hoben M, Norton P, Estabrooks CA. Association of work environment with missed and rushed care tasks among care aides in nursing homes. *JAMA Netw Open*. 2020;3(1):e1920092. doi:10.1001/jamanetworkopen.2019.20092

**eTable 1.** Psychometric Properties of the Alberta Context Tool

**eTable 2.** Characteristics of Care Aides With Complete Data and Those With Incomplete Data

**eTable 3.** Multivariable Analyses of Organizational Context With Missed Care

**eTable 4.** Multivariable Analyses of Organizational Context With Rushed Care

**eTable 5.** Multivariable Analyses of 10 Elements of Organizational Context With Missed Care

**eTable 6.** Multivariable Analyses of 10 Elements of Organizational Context With Rushed Care

This supplementary material has been provided by the authors to give readers additional information about their work.

**eTable 1.** Psychometric Properties of the Alberta Context Tool

| <b>Reliability</b>   | Result                                                                                                                                                                                          |
|----------------------|-------------------------------------------------------------------------------------------------------------------------------------------------------------------------------------------------|
| Internal consistency | The Cronbach's alpha for 8 of the 10 elements exceeded 0.7, which is a commonly accepted standard.                                                                                              |
| <b>Validity</b>      |                                                                                                                                                                                                 |
| Internal structure   | Confirmatory factor analyses demonstrated that the overall pattern of the data tested was consistent with the structure hypothesized in the development of ACT.                                 |
| Convergent validity  | Bivariate associations with instrumental research use (which the ACT was designed to predict) showed that more positive contextual were statistically significant for 8 of the 10 ACT elements. |

**eTable 2.** Characteristics of Care Aides With Complete Data and Those With Incomplete Data

| Variable                                 | Care aides with complete data n (%) | Care aides with incomplete data n (%) | Total n (%)      |
|------------------------------------------|-------------------------------------|---------------------------------------|------------------|
| <b>Number of care aides</b>              | 3957 (98.53)                        | 59 (1.47)                             | 4016 (100)       |
| <b>Age, y</b>                            |                                     |                                       |                  |
| <29                                      | 391 (9.88)                          | 5 (8.47)                              | 396 (9.86)       |
| 30–39                                    | 852 (21.5)                          | 11 (18.6)                             | 863 (21.5)       |
| 40–49                                    | 1251 (31.6)                         | 24 (40.7)                             | 1275 (31.7)      |
| 50–59                                    | 1030 (26.0)                         | 16 (27.1)                             | 1046 (26.0)      |
| >60                                      | 433 (10.9)                          | 3 (5.08)                              | 436 (10.9)       |
| <b>Female</b>                            | 3529 (89.2)                         | 45 (83.3)                             | 3574 (89.1)      |
| <b>Health Care Aide certificate</b>      | 3702 (93.6)                         | 56 (96.6)                             | 3758 (93.6)      |
| <b>English as first language</b>         | 1327 (33.5)                         | 26 (44.8)                             | 1353 (33.7)      |
| <b>Shift worked most often</b>           |                                     |                                       |                  |
| Day                                      | 1940 (49.0)                         | 28 (47.5)                             | 1968 (49.0)      |
| Evening                                  | 1556 (39.3)                         | 22 (37.3)                             | 1578 (39.3)      |
| Night                                    | 461 (11.7)                          | 9 (15.3)                              | 470 (11.7)       |
| <b>Variable</b>                          | <b>Mean (SD)</b>                    | <b>Mean (SD)</b>                      | <b>Mean (SD)</b> |
| <b>Experience on current unit, y</b>     | 5.83 (5.93)                         | 4.57 (3.83)                           | 5.81 (5.91)      |
| <b>Responsive behaviors by residents</b> | 3.26 (1.66)                         | 2.96 (1.73)                           | 3.25 (1.66)      |
| <b>Job satisfaction</b>                  | 4.24 (0.64)                         | 4.44 (0.51)                           | 4.24 (0.64)      |
| <b>Burnout</b>                           |                                     |                                       |                  |
| MBI Emotional Exhaustion                 | 2.61 (1.68)                         | 2.24 (1.69)                           | 2.60 (1.68)      |
| MBI Cynicism                             | 2.68 (1.63)                         | 2.77 (1.77)                           | 2.68 (1.63)      |
| MBI Efficacy                             | 5.40 (0.85)                         | 5.49 (0.70)                           | 5.40 (0.85)      |
| <b>Physical health</b>                   | 49.1 (8.18)                         | 50.0 (8.58)                           | 49.1 (8.18)      |
| <b>Mental health</b>                     | 51.9 (8.48)                         | 53.6 (8.05)                           | 51.9 (8.48)      |

Abbreviations: MBI, Maslach Burnout Inventory; SD, standard deviation.

**eTable 3.** Multivariable Analyses of Organizational Context With Missed Care

| Variable                                    | Logistic Component <sup>a</sup> |          |         | Poisson Component <sup>b</sup> |          |         |
|---------------------------------------------|---------------------------------|----------|---------|--------------------------------|----------|---------|
|                                             | OR (95% CI)                     | Estimate | P value | RR (95% CI)                    | Estimate | P value |
| Intercept                                   | 0.01 (0.003-0.04)               | -4.52    | <.001   | 3.31 (1.76-6.25)               | 1.20     | <.001   |
| <b>Organizational context</b>               |                                 |          |         |                                |          |         |
| Less favorable                              | 1 [Reference]                   | NA       | NA      | 1 [Reference]                  | NA       | NA      |
| More favorable                              | 1.59 (1.34-1.90)                | 0.47     | <.001   | 0.92 (0.84-1.01)               | -0.08    | .08     |
| <b>Age, y</b>                               |                                 |          |         |                                |          |         |
| <29                                         | 1 [Reference]                   | NA       | NA      | 1 [Reference]                  | NA       | NA      |
| 30–39                                       | 1.32 (1.00-1.74)                | 0.28     | .05     | 0.88 (0.76-1.01)               | -0.13    | .06     |
| 40–49                                       | 1.32 (1.00-1.72)                | 0.27     | .05     | 0.96 (0.84-1.09)               | -0.04    | .55     |
| 50–59                                       | 1.44 (1.08-1.91)                | 0.36     | .01     | 1.03 (0.90-1.18)               | 0.03     | .65     |
| >60                                         | 1.52 (1.09-2.12)                | 0.42     | .01     | 0.96 (0.81-1.14)               | -0.04    | .64     |
| <b>Sex</b>                                  |                                 |          |         |                                |          |         |
| Male                                        | 1 [Reference]                   | NA       | NA      | 1 [Reference]                  | NA       | NA      |
| Female                                      | 0.84 (0.67-1.05)                | -0.18    | .12     | 1.12 (0.98-1.28)               | 0.11     | .09     |
| <b>Healthcare aide certificate received</b> |                                 |          |         |                                |          |         |
| No                                          | 1 [Reference]                   | NA       | NA      | 1 [Reference]                  | NA       | NA      |
| Yes                                         | 1.32 (0.99-1.76)                | 0.28     | .06     | 1.03 (0.87-1.22)               | 0.03     | .71     |
| <b>English as first language</b>            |                                 |          |         |                                |          |         |
| Yes                                         | 1 [Reference]                   | NA       | NA      | 1 [Reference]                  | NA       | NA      |
| No                                          | 1.57 (1.33-1.85)                | 0.45     | <.001   | 1.06 (0.97-1.15)               | 0.06     | .17     |
| <b>Shift worked most of the time</b>        |                                 |          |         |                                |          |         |
| Day                                         | 1 [Reference]                   | NA       | NA      | 1 [Reference]                  | NA       | NA      |
| Evening                                     | 1.36 (1.18-1.58)                | 0.31     | <.001   | 0.89 (0.82-0.97)               | -0.11    | .005    |
| Night                                       | 2.95 (2.33-3.74)                | 1.08     | <.001   | 1.1 (0.97-1.25)                | 0.09     | .15     |
| <b>Experience on current unit, y</b>        | 1 (0.99-1.01)                   | -0.002   | .80     | 1.01 (1.00-1.02)               | 0.01     | .005    |
| <b>Responsive behaviors from residents</b>  | 0.87 (0.83-0.91)                | -0.14    | <.001   | 1.07 (1.04-1.09)               | 0.06     | <.001   |
| <b>Job satisfaction</b>                     | 1.51 (1.33-1.72)                | 0.41     | <.001   | 0.9 (0.85-0.95)                | -0.11    | <.001   |
| <b>Burnout</b>                              |                                 |          |         |                                |          |         |
| MBI_Exhaustion                              | 0.88 (0.83-0.94)                | -0.13    | <.001   | 1.05 (1.02-1.09)               | 0.05     | .002    |
| MBI_Cynicism                                | 1.03 (0.98-1.09)                | 0.03     | .22     | 1.03 (1.00-1.07)               | 0.03     | .02     |
| MBI_Efficacy                                | 1.11 (1.02-1.21)                | 0.10     | .02     | 0.95 (0.91-0.99)               | -0.05    | .01     |
| <b>Physical health</b>                      | 1.01 (1.00-1.02)                | 0.01     | .26     | 1 (0.99-1.00)                  | -0.004   | .12     |
| <b>Mental health</b>                        | 1.02 (1.01-1.03)                | 0.02     | <.001   | 1 (1.00-1.01)                  | 0.001    | .67     |
| <b>Unit type</b>                            |                                 |          |         |                                |          |         |

| Variable                                                         | Logistic Component <sup>a</sup> |          |         | Poisson Component <sup>b</sup> |          |         |
|------------------------------------------------------------------|---------------------------------|----------|---------|--------------------------------|----------|---------|
|                                                                  | OR (95% CI)                     | Estimate | P value | RR (95% CI)                    | Estimate | P value |
| General nursing home                                             | 1 [Reference]                   | NA       | NA      | 1 [Reference]                  | NA       | NA      |
| Secure dementia                                                  | 1.07 (0.84-1.36)                | 0.07     | .58     | 1.04 (0.91-1.18)               | 0.04     | .59     |
| Non-secure dementia                                              | 1.31 (0.90-1.91)                | 0.27     | .16     | 0.94 (0.75-1.18)               | -0.06    | .60     |
| Secure mental health/psychiatric                                 | 2.27 (0.84-6.13)                | 0.82     | .10     | 0.65 (0.27-1.58)               | -0.43    | .34     |
| Other                                                            | 0.76 (0.54-1.08)                | -0.27    | .12     | 0.9 (0.72-1.11)                | -0.11    | .31     |
| <b>Unit staffing level</b>                                       | 1.09 (0.99-1.20)                | 0.08     | .09     | 0.95 (0.90-1.01)               | -0.05    | .12     |
| <b>Percent of care aide staffing hours out of total staffing</b> | 1 (0.99-1.01)                   | -0.001   | .81     | 1 (1.00-1.01)                  | 0.003    | .20     |
| <b>Owner-operator model</b>                                      |                                 |          |         |                                |          |         |
| Public not-for-profit                                            | 1 [Reference]                   | NA       | NA      | 1 [Reference]                  | NA       | NA      |
| Private for-profit                                               | 1.08 (0.86-1.36)                | 0.08     | .51     | 0.84 (0.74-0.96)               | -0.17    | .01     |
| Voluntary not-for-profit                                         | 0.75 (0.59-0.96)                | -0.28    | .02     | 1.04 (0.91-1.18)               | 0.04     | .60     |
| <b>Nursing home size</b>                                         |                                 |          |         |                                |          |         |
| Small                                                            | 1 [Reference]                   | NA       | NA      | 1 [Reference]                  | NA       | NA      |
| Medium                                                           | 1.17 (0.90-1.53)                | 0.16     | .24     | 0.93 (0.81-1.07)               | -0.07    | .32     |
| Large                                                            | 1.02 (0.79-1.31)                | 0.02     | .90     | 0.79 (0.70-0.90)               | -0.23    | .001    |
| <b>Health region</b>                                             |                                 |          |         |                                |          |         |
| Winnipeg Regional Health Authority                               | 1 [Reference]                   | NA       | NA      | 1 [Reference]                  | NA       | NA      |
| Alberta Health Edmonton zone                                     | 1.41 (1.08-1.84)                | 0.34     | .01     | 0.72 (0.62-0.84)               | -0.32    | <.001   |
| Alberta Health Calgary zone                                      | 1.17 (0.89-1.54)                | 0.16     | .25     | 0.83 (0.71-0.96)               | -0.19    | .02     |
| BC Fraser Health Authority                                       | 0.67 (0.53-0.86)                | -0.39    | .002    | 0.82 (0.72-0.93)               | -0.20    | .003    |
| BC Interior Health Authority                                     | 1.75 (1.14-2.68)                | 0.56     | .01     | 0.79 (0.62-1.01)               | -0.24    | .06     |
| <b>Random intercept for unit clustering</b>                      | 1.08 (1.01-1.17)                | 0.08     | .03     | 1.04 (1.01-1.06)               | 0.03     | .001    |

Abbreviations: OR, odds ratio; NA, not applicable; RR, relative rate; MBI, Maslach Burnout Inventory; BC, British Columbia.

<sup>a</sup> Models the likelihood of 0 missed or rushed care.

<sup>b</sup> Compares numbers of missed or rushed care tasks among individuals with at least 1 missed or rushed care task.

**eTable 4.** Multivariable Analyses of Organizational Context With Rushed Care

| Variable                                    | Logistic Component <sup>a</sup> |          |         | Poisson Component <sup>b</sup> |          |         |
|---------------------------------------------|---------------------------------|----------|---------|--------------------------------|----------|---------|
|                                             | OR (95% CI)                     | Estimate | P value | RR (95% CI)                    | Estimate | P value |
| Intercept                                   | 0 (<.001-0.01)                  | -6.54    | <.001   | 7.46 (5.28-10.5)               | 2.01     | <.001   |
| <b>Organizational context</b>               |                                 |          |         |                                |          |         |
| Less favorable                              | 1 [Reference]                   | NA       | NA      | 1 [Reference]                  | NA       | NA      |
| More favorable                              | 1.66 (1.38-1.99)                | 0.50     | <.001   | 0.93 (0.88-0.98)               | -0.07    | .007    |
| <b>Age, y</b>                               |                                 |          |         |                                |          |         |
| <29                                         | 1 [Reference]                   | NA       | NA      | 1 [Reference]                  | NA       | NA      |
| 30–39                                       | 1.17 (0.86-1.58)                | 0.15     | .33     | 1.05 (0.97-1.13)               | 0.05     | .22     |
| 40–49                                       | 1.22 (0.90-1.63)                | 0.20     | .20     | 1.04 (0.97-1.12)               | 0.04     | .25     |
| 50–59                                       | 1.22 (0.89-1.66)                | 0.20     | .21     | 1.03 (0.95-1.11)               | 0.03     | .50     |
| >60                                         | 1.21 (0.84-1.73)                | 0.19     | .31     | 1.01 (0.92-1.10)               | 0.01     | .90     |
| <b>Sex</b>                                  |                                 |          |         |                                |          |         |
| Male                                        | 1 [Reference]                   | NA       | NA      | 1 [Reference]                  | NA       | NA      |
| Female                                      | 0.93 (0.73-1.17)                | -0.08    | .52     | 1.01 (0.95-1.08)               | 0.01     | .71     |
| <b>Healthcare aide certificate received</b> |                                 |          |         |                                |          |         |
| No                                          | 1 [Reference]                   | NA       | NA      | 1 [Reference]                  | NA       | NA      |
| Yes                                         | 1.24 (0.91-1.68)                | 0.21     | .17     | 1.04 (0.95-1.13)               | 0.03     | .43     |
| <b>English as first language</b>            |                                 |          |         |                                |          |         |
| Yes                                         | 1 [Reference]                   | NA       | NA      | 1 [Reference]                  | NA       | NA      |
| No                                          | 1.81 (1.51-2.18)                | 0.59     | <.001   | 0.93 (0.89-0.97)               | -0.07    | .002    |
| <b>Shift worked most of the time</b>        |                                 |          |         |                                |          |         |
| Day                                         | 1 [Reference]                   | NA       | NA      | 1 [Reference]                  | NA       | NA      |
| Evening                                     | 1.38 (1.17-1.61)                | 0.32     | .0001   | 0.93 (0.89-0.97)               | -0.07    | .0009   |
| Night                                       | 2.19 (1.72-2.77)                | 0.78     | <.001   | 0.72 (0.66-0.78)               | -0.33    | <.001   |
| <b>Experience on current unit, y</b>        | 0.99 (0.98-1.00)                | -0.01    | .20     | 1 (1.00-1.01)                  | 0.003    | .08     |
| <b>Responsive behaviors from residents</b>  | 0.82 (0.79-0.86)                | -0.19    | <.001   | 1.05 (1.04-1.07)               | 0.05     | <.001   |
| <b>Job satisfaction</b>                     | 1.86 (1.61-2.15)                | 0.62     | <.001   | 0.88 (0.85-0.91)               | -0.13    | <.001   |
| <b>Burnout</b>                              |                                 |          |         |                                |          |         |
| MBI_Exhaustion                              | 0.82 (0.77-0.87)                | -0.20    | <.001   | 1.03 (1.02-1.05)               | 0.03     | <.001   |
| MBI_Cynicism                                | 1.07 (1.01-1.13)                | 0.07     | .02     | 0.99 (0.98-1.01)               | -0.01    | .34     |
| MBI_Efficacy                                | 1.15 (1.05-1.27)                | 0.14     | .003    | 1 (0.97-1.02)                  | -0.004   | .75     |
| <b>Physical health</b>                      | 1.02 (1.01-1.03)                | 0.02     | .003    | 1 (1.00-1.00)                  | <.001    | .88     |
| <b>Mental health</b>                        | 1.02 (1.01-1.03)                | 0.02     | .001    | 1 (1.00-1.00)                  | -0.001   | .23     |
| <b>Unit type</b>                            |                                 |          |         |                                |          |         |

| Variable                                                         | Logistic Component <sup>a</sup> |          |         | Poisson Component <sup>b</sup> |          |         |
|------------------------------------------------------------------|---------------------------------|----------|---------|--------------------------------|----------|---------|
|                                                                  | OR (95% CI)                     | Estimate | P value | RR (95% CI)                    | Estimate | P value |
| General nursing home                                             | 1 [Reference]                   | NA       | NA      | 1 [Reference]                  | NA       | NA      |
| Secure dementia                                                  | 1.32 (1.03-1.70)                | 0.28     | .03     | 1 (0.93-1.08)                  | 0.003    | .93     |
| Non-secure dementia                                              | 1.21 (0.82-1.81)                | 0.19     | .34     | 1.04 (0.94-1.16)               | 0.04     | .45     |
| Secure mental health/psychiatric                                 | 1.37 (0.58-3.24)                | 0.32     | .47     | 0.9 (0.66-1.22)                | -0.11    | .49     |
| Other                                                            | 0.99 (0.69-1.41)                | -0.01    | .94     | 0.98 (0.89-1.09)               | -0.02    | .71     |
| <b>Unit staffing level</b>                                       | 1.35 (1.22-1.50)                | 0.30     | <.001   | 0.99 (0.95-1.02)               | -0.01    | .39     |
| <b>Percent of care aide staffing hours out of total staffing</b> | 0.99 (0.98-1.00)                | -0.01    | .02     | 1 (1.00-1.00)                  | 0.001    | .62     |
| <b>Owner-operator model</b>                                      |                                 |          |         |                                |          |         |
| Public not-for-profit                                            | 1 [Reference]                   | NA       | NA      | 1 [Reference]                  | NA       | NA      |
| Private for-profit                                               | 1.24 (0.98-1.58)                | 0.22     | .07     | 0.93 (0.87-0.99)               | -0.07    | .03     |
| Voluntary not-for-profit                                         | 0.87 (0.68-1.12)                | -0.13    | .29     | 0.97 (0.91-1.04)               | -0.03    | .38     |
| <b>Nursing home size</b>                                         |                                 |          |         |                                |          |         |
| Small                                                            | 1 [Reference]                   | NA       | NA      | 1 [Reference]                  | NA       | NA      |
| Medium                                                           | 1.24 (0.94-1.64)                | 0.22     | .13     | 0.95 (0.88-1.02)               | -0.05    | .17     |
| Large                                                            | 1.22 (0.93-1.59)                | 0.20     | .15     | 0.95 (0.88-1.02)               | -0.06    | .13     |
| <b>Health region</b>                                             |                                 |          |         |                                |          |         |
| Winnipeg Regional Health Authority                               | 1 [Reference]                   | NA       | NA      | 1 [Reference]                  | NA       | NA      |
| Alberta Health Edmonton zone                                     | 0.97 (0.74-1.28)                | -0.03    | .83     | 0.96 (0.88-1.03)               | -0.05    | .26     |
| Alberta Health Calgary zone                                      | 0.97 (0.74-1.28)                | -0.03    | .84     | 0.9 (0.83-0.98)                | -0.10    | .01     |
| BC Fraser Health Authority                                       | 0.9 (0.70-1.15)                 | -0.11    | .39     | 0.94 (0.87-1.01)               | -0.06    | .09     |
| BC Interior Health Authority                                     | 1.35 (0.86-2.12)                | 0.30     | .19     | 0.9 (0.80-1.02)                | -0.10    | .09     |
| <b>Random intercept for unit clustering</b>                      | 1.06 (0.97-1.15)                | 0.06     | .19     | 1.01 (1.00-1.02)               | 0.009    | .009    |

Abbreviations: OR, odds ratio; NA, not applicable; RR, relative rate; MBI, Maslach Burnout Inventory; BC, British Columbia.

<sup>a</sup> Models the likelihood of 0 missed or rushed care.

<sup>b</sup> Compares numbers of missed or rushed care tasks among individuals with at least 1 missed or rushed care task.

**eTable 5.** Multivariable Analyses of 10 Elements of Organizational Context With Missed Care

| Variable                                    | Logistic Component <sup>a</sup> |          |         | Poisson Component <sup>b</sup> |          |         |
|---------------------------------------------|---------------------------------|----------|---------|--------------------------------|----------|---------|
|                                             | OR (95% CI)                     | Estimate | P value | RR (95% CI)                    | Estimate | P value |
| Intercept                                   | 0.01 (0.00-0.06)                | -5.13    | <.0001  | 14.0 (4.10-48.0)               | 2.64     | <.0001  |
| <b>Organizational context element</b>       |                                 |          |         |                                |          |         |
| ACT - Leadership                            | 1.33 (0.86-2.05)                | 0.28     | .20     | 0.84 (0.67-1.06)               | -0.17    | .15     |
| ACT - Culture                               | 0.38 (0.19-0.73)                | -0.98    | .004    | 1.51 (1.06-2.14)               | 0.41     | .02     |
| ACT - Evaluation                            | 1.02 (0.64-1.65)                | 0.02     | .92     | 1.07 (0.83-1.37)               | 0.06     | .62     |
| ACT - Formal interaction                    | 0.90 (0.64-1.25)                | -0.11    | .52     | 1.08 (0.91-1.29)               | 0.08     | .38     |
| ACT - Informal interaction                  | 1.09 (0.94-1.27)                | 0.09     | .25     | 0.96 (0.88-1.05)               | -0.04    | .40     |
| ACT - Social capital                        | 1.06 (0.59-1.88)                | 0.06     | .85     | 0.51 (0.36-0.70)               | -0.68    | <.0001  |
| ACT - Structural and electronic resources   | 1.00 (0.84-1.18)                | -0.004   | .97     | 0.97 (0.88-1.07)               | -0.03    | .55     |
| ACT - Organizational slack-staff            | 1.65 (1.32-2.05)                | 0.50     | <.0001  | 0.80 (0.71-0.90)               | -0.22    | .0004   |
| ACT - Organizational slack-space            | 0.98 (0.86-1.12)                | -0.02    | .78     | 1.01 (0.94-1.08)               | 0.01     | .85     |
| ACT - Organizational slack-time             | 2.03 (1.44-2.86)                | 0.71     | <.0001  | 1.25 (1.03-1.50)               | 0.22     | .02     |
| <b>Age, y</b>                               |                                 |          |         |                                |          |         |
| <29                                         | 1 [Reference]                   | NA       | NA      | 1 [Reference]                  | NA       | NA      |
| 30–39                                       | 1.28 (0.97-1.68)                | 0.25     | .08     | 0.88 (0.77-1.01)               | -0.13    | .06     |
| 40–49                                       | 1.30 (1.00-1.70)                | 0.26     | .05     | 0.97 (0.85-1.10)               | -0.03    | .60     |
| 50–59                                       | 1.43 (1.08-1.89)                | 0.36     | .01     | 1.03 (0.90-1.18)               | 0.03     | .67     |
| >60                                         | 1.51 (1.09-2.11)                | 0.41     | .01     | 0.96 (0.81-1.13)               | -0.04    | .61     |
| <b>Sex</b>                                  |                                 |          |         |                                |          |         |
| Male                                        | 1 [Reference]                   | NA       | NA      | 1 [Reference]                  | NA       | NA      |
| Female                                      | 0.85 (0.68-1.07)                | -0.16    | .16     | 1.11 (0.97-1.26)               | 0.10     | .13     |
| <b>Healthcare aide certificate received</b> |                                 |          |         |                                |          |         |
| No                                          | 1 [Reference]                   | NA       | NA      | 1 [Reference]                  | NA       | NA      |
| Yes                                         | 1.26 (0.94-1.68)                | 0.23     | .12     | 1.01 (0.86-1.20)               | 0.01     | .87     |
| <b>English as first language</b>            |                                 |          |         |                                |          |         |
| Yes                                         | 1 [Reference]                   | NA       | NA      | 1 [Reference]                  | NA       | NA      |
| No                                          | 1.48 (1.25-1.75)                | 0.39     | <.0001  | 1.04 (0.96-1.14)               | 0.04     | .34     |
| <b>Shift worked most of the time</b>        |                                 |          |         |                                |          |         |
| Day                                         | 1 [Reference]                   | NA       | NA      | 1 [Reference]                  | NA       | NA      |
| Evening                                     | 1.39 (1.20-1.62)                | 0.33     | <.0001  | 0.89 (0.82-0.96)               | -0.12    | .004    |
| Night                                       | 3.00 (2.37-3.80)                | 1.10     | <.0001  | 1.10 (0.97-1.25)               | 0.09     | .15     |
| <b>Experience on current unit, y</b>        | 1.00 (0.98-1.01)                | -0.003   | .69     | 1.01 (1.00-1.02)               | 0.01     | .004    |
| <b>Responsive behaviors from residents</b>  | 0.87 (0.83-0.91)                | -0.14    | <.0001  | 1.07 (1.04-1.09)               | 0.06     | <.0001  |



| Variable                                                         | Logistic Component <sup>a</sup> |          |         | Poisson Component <sup>b</sup> |          |         |
|------------------------------------------------------------------|---------------------------------|----------|---------|--------------------------------|----------|---------|
|                                                                  | OR (95% CI)                     | Estimate | P value | RR (95% CI)                    | Estimate | P value |
| <b>Job satisfaction</b>                                          | 1.47 (1.29-1.67)                | 0.38     | <.0001  | 0.91 (0.86-0.97)               | -0.09    | .003    |
| <b>Burnout</b>                                                   |                                 |          |         |                                |          |         |
| MBI_ Exhaustion                                                  | 0.89 (0.84-0.95)                | -0.11    | .0002   | 1.06 (1.02-1.09)               | 0.05     | .0008   |
| MBI_ Cynicism                                                    | 1.03 (0.97-1.08)                | 0.02     | .36     | 1.03 (1.00-1.06)               | 0.03     | .03     |
| MBI_ Efficacy                                                    | 1.11 (1.02-1.21)                | 0.10     | .02     | 0.95 (0.91-0.99)               | -0.05    | .02     |
| <b>Physical health</b>                                           | 1.00 (1.00-1.01)                | 0.005    | .34     | 1.00 (0.99-1.00)               | -0.004   | .14     |
| <b>Mental health</b>                                             | 1.02 (1.01-1.03)                | 0.02     | <.0001  | 1.00 (1.00-1.01)               | 0.0009   | .69     |
| <b>Unit type</b>                                                 |                                 |          |         |                                |          |         |
| General nursing home                                             | 1 [Reference]                   | NA       | NA      | 1 [Reference]                  | NA       | NA      |
| Secure dementia                                                  | 1.19 (0.95-1.49)                | 0.17     | .13     | 1.02 (0.90-1.16)               | 0.02     | .75     |
| Non-secure dementia                                              | 1.08 (0.76-1.54)                | 0.08     | .66     | 0.87 (0.36-2.09)               | -0.14    | .76     |
| Secure mental health/psychiatric                                 | 1.61 (0.63-4.13)                | 0.47     | .32     | 0.92 (0.75-1.13)               | -0.09    | .42     |
| Other                                                            | 0.84 (0.60-1.16)                | -0.18    | .29     | 0.99 (0.80-1.23)               | -0.01    | .96     |
| <b>Unit staffing level</b>                                       | 0.97 (0.88-1.06)                | -0.03    | .48     | 0.96 (0.91-1.02)               | -0.04    | .20     |
| <b>Percent of care aide staffing hours out of total staffing</b> | 1.00 (0.99-1.01)                | -0.0003  | .93     | 1.00 (1.00-1.01)               | 0.002    | .28     |
| <b>Owner-operator model</b>                                      |                                 |          |         |                                |          |         |
| Public not-for-profit                                            | 1 [Reference]                   | NA       | NA      | 1 [Reference]                  | NA       | NA      |
| Private for-profit                                               | 0.93 (0.74-1.16)                | -0.07    | .52     | 0.87 (0.77-0.99)               | -0.14    | .04     |
| Voluntary not-for-profit                                         | 0.74 (0.59-0.92)                | -0.30    | .007    | 1.08 (0.95-1.23)               | 0.08     | .23     |
| <b>Nursing home size</b>                                         |                                 |          |         |                                |          |         |
| Small                                                            | 1 [Reference]                   | NA       | NA      | 1 [Reference]                  | NA       | NA      |
| Medium                                                           | 1.13 (0.87-1.45)                | 0.12     | .36     | 0.86 (0.75-0.98)               | -0.15    | .03     |
| Large                                                            | 1.05 (0.82-1.34)                | 0.05     | .70     | 0.74 (0.65-0.84)               | -0.31    | <.0001  |
| <b>Health region</b>                                             |                                 |          |         |                                |          |         |
| Winnipeg Regional Health Authority                               | 1 [Reference]                   | NA       | NA      | 1 [Reference]                  | NA       | NA      |
| Alberta Health Edmonton zone                                     | 1.62 (1.26-2.09)                | 0.48     | .0002   | 0.73 (0.63-0.84)               | -0.32    | <.0001  |
| Alberta Health Calgary zone                                      | 1.04 (0.79-1.37)                | 0.04     | .77     | 0.81 (0.69-0.95)               | -0.21    | .01     |
| BC Fraser Health Authority                                       | 0.69 (0.55-0.88)                | -0.37    | .002    | 0.83 (0.73-0.94)               | -0.19    | .003    |
| BC Interior Health Authority                                     | 1.56 (1.04-2.35)                | 0.45     | .03     | 0.82 (0.64-1.04)               | -0.20    | .10     |
| <b>Random intercept for unit clustering</b>                      | 1.00 (0.95-1.06)                | 0.004    | .88     | 1.02 (1.00-1.03)               | 0.02     | .07     |

Abbreviations: ACT, the Alberta Context Tool; OR, odds ratio; NA, not applicable; RR, relative rate; MBI, Maslach Burnout Inventory; BC, British Columbia.

<sup>a</sup> Models the likelihood of 0 missed or rushed care.

<sup>b</sup> Compares numbers of missed or rushed care tasks among individuals with at least 1 missed or rushed care task.

**eTable 6.** Multivariable Analyses of 10 Elements of Organizational Context With Rushed Care

| Variable                                    | Logistic Component <sup>a</sup> |         |         | Poisson Component <sup>b</sup> |          |         |
|---------------------------------------------|---------------------------------|---------|---------|--------------------------------|----------|---------|
|                                             | OR (95% CI)                     | Estimat | P value | RR (95% CI)                    | Estimate | P value |
| Intercept                                   | 0.86 (0.04-16.8)                | -0.15   | .92     | 1.26 (0.56-2.85)               | 0.23     | .58     |
| <b>Organizational context element</b>       |                                 |         |         |                                |          |         |
| ACT - Leadership                            | 0.75 (0.45-1.25)                | -0.29   | .26     | 0.93 (0.81-1.07)               | -0.07    | .31     |
| ACT - Culture                               | 0.70 (0.34-1.45)                | -0.36   | .33     | 1.34 (1.09-1.65)               | 0.29     | .006    |
| ACT - Evaluation                            | 0.78 (0.46-1.30)                | -0.25   | .34     | 1.04 (0.89-1.21)               | 0.04     | .63     |
| ACT - Formal interaction                    | 1.02 (0.71-1.46)                | 0.02    | .91     | 1.06 (0.95-1.18)               | 0.06     | .27     |
| ACT - Informal interaction                  | 0.90 (0.76-1.06)                | -0.11   | .20     | 1.03 (0.98-1.08)               | 0.03     | .32     |
| ACT - Social capital                        | 0.67 (0.35-1.28)                | -0.41   | .22     | 1.24 (1.02-1.50)               | 0.21     | .03     |
| ACT - Structural and electronic resources   | 1.25 (1.03-1.52)                | 0.23    | .02     | 0.94 (0.89-0.99)               | -0.06    | .03     |
| ACT - Organizational slack-staff            | 1.91 (1.51-2.42)                | 0.65    | <.0001  | 0.91 (0.85-0.98)               | -0.09    | .01     |
| ACT - Organizational slack-space            | 0.95 (0.82-1.10)                | -0.05   | .50     | 1.00 (0.96-1.04)               | -0.0009  | .97     |
| ACT - Organizational slack-time             | 1.14 (0.79-1.65)                | 0.13    | .47     | 0.90 (0.80-1.01)               | -0.11    | .06     |
| <b>Age, y</b>                               |                                 |         |         |                                |          |         |
| <29                                         | 1 [Reference]                   | NA      | NA      | 1 [Reference]                  | NA       | NA      |
| 30–39                                       | 0.98 (0.72-1.32)                | -0.02   | .89     | 1.07 (1.00-1.16)               | 0.07     | .06     |
| 40–49                                       | 1.04 (0.78-1.40)                | 0.04    | .77     | 1.06 (0.99-1.14)               | 0.06     | .10     |
| 50–59                                       | 1.08 (0.80-1.46)                | 0.08    | .63     | 1.04 (0.97-1.13)               | 0.04     | .25     |
| >60                                         | 1.01 (0.71-1.45)                | 0.01    | .95     | 1.03 (0.94-1.13)               | 0.03     | .53     |
| <b>Sex</b>                                  |                                 |         |         |                                |          |         |
| Male                                        | 1 [Reference]                   | NA      | NA      | 1 [Reference]                  | NA       | NA      |
| Female                                      | 0.85 (0.67-1.07)                | -0.16   | .18     | 1.02 (0.95-1.09)               | 0.02     | .54     |
| <b>Healthcare aide certificate received</b> |                                 |         |         |                                |          |         |
| No                                          | 1 [Reference]                   | NA      | NA      | 1 [Reference]                  | NA       | NA      |
| Yes                                         | 1.00 (0.74-1.34)                | -0.004  | .98     | 1.08 (0.99-1.18)               | 0.08     | .10     |
| <b>English as first language</b>            |                                 |         |         |                                |          |         |
| Yes                                         | 1 [Reference]                   | NA      | NA      | 1 [Reference]                  | NA       | NA      |
| No                                          | 1.76 (1.47-2.11)                | 0.57    | <.0001  | 0.94 (0.90-0.99)               | -0.06    | .02     |
| <b>Shift worked most of the time</b>        |                                 |         |         |                                |          |         |
| Day                                         | 1 [Reference]                   | NA      | NA      | 1 [Reference]                  | NA       | NA      |
| Evening                                     | 1.28 (1.09-1.50)                | 0.25    | .003    | 0.93 (0.89-0.97)               | -0.07    | .0006   |
| Night                                       | 1.81 (1.43-2.29)                | 0.59    | <.0001  | 0.73 (0.67-0.79)               | -0.32    | <.0001  |
| <b>Experience on current unit, y</b>        | 0.99 (0.98-1.01)                | -0.01   | .37     | 1.00 (1.00-1.01)               | 0.004    | .02     |
| <b>Responsive behaviors from residents</b>  | 0.82 (0.78-0.86)                | -0.20   | <.0001  | 1.05 (1.04-1.07)               | 0.05     | <.0001  |

| Variable                                                         | Logistic Component <sup>a</sup> |         |         | Poisson Component <sup>b</sup> |          |         |
|------------------------------------------------------------------|---------------------------------|---------|---------|--------------------------------|----------|---------|
|                                                                  | OR (95% CI)                     | Estimat | P value | RR (95% CI)                    | Estimate | P value |
| <b>Job satisfaction</b>                                          | 1.79 (1.55-2.08)                | 0.58    | <.0001  | 0.86 (0.83-0.89)               | -0.15    | <.0001  |
| <b>Burnout</b>                                                   |                                 |         |         |                                |          |         |
| MBI_ Exhaustion                                                  | 0.80 (0.75-0.85)                | -0.23   | <.0001  | 1.04 (1.02-1.06)               | 0.04     | <.0001  |
| MBI_ Cynicism                                                    | 1.06 (1.00-1.12)                | 0.06    | .05     | 0.99 (0.97-1.01)               | -0.01    | .22     |
| MBI_ Efficacy                                                    | 1.10 (1.01-1.21)                | 0.10    | .04     | 1.01 (0.98-1.03)               | 0.01     | .52     |
| <b>Physical health</b>                                           | 1.01 (1.00-1.02)                | 0.01    | .11     | 1.00 (1.00-1.00)               | 0.001    | .32     |
| <b>Mental health</b>                                             | 1.01 (1.00-1.02)                | 0.01    | .12     | 1.00 (1.00-1.00)               | -0.0002  | .84     |
| <b>Unit type</b>                                                 |                                 |         |         |                                |          |         |
| General nursing home                                             | 1 [Reference]                   | NA      | NA      | 1 [Reference]                  | NA       | NA      |
| Secure dementia                                                  | 1.22 (0.95-1.56 )               | 0.20    | .12     | 0.96 (0.89-1.04 )              | -0.04    | .2935   |
| Non-secure dementia                                              | 1.00 (0.69-1.46 )               | 0.003   | .99     | 1.09 (0.97-1.22 )              | 0.08     | .1343   |
| Secure mental health/psychiatric                                 | 1.02 (0.43-2.46 )               | 0.02    | .96     | 0.93 (0.68-1.28 )              | -0.07    | .6557   |
| Other                                                            | 1.01 (0.70-1.46 )               | 0.01    | .94     | 0.94 (0.85-1.05 )              | -0.06    | .2709   |
| <b>Unit staffing level</b>                                       | 1.18 (1.06-1.31)                | 0.16    | .002    | 1.01 (0.97-1.04)               | 0.01     | .77     |
| <b>Percent of care aide staffing hours out of total staffing</b> | 0.98 (0.97-0.99)                | -0.02   | <.0001  | 1.00 (1.00-1.00)               | 0.003    | .03     |
| <b>Owner-operator model</b>                                      |                                 |         |         |                                |          |         |
| Public not-for-profit                                            | 1 [Reference]                   | NA      | NA      | 1 [Reference]                  | NA       | NA      |
| Private for-profit                                               | 1.11 (0.87-1.42)                | 0.11    | .40     | 0.98 (0.91-1.06)               | -0.02    | .66     |
| Voluntary not-for-profit                                         | 0.84 (0.67-1.07)                | -0.17   | .15     | 0.97 (0.90-1.04)               | -0.03    | .35     |
| <b>Nursing home size</b>                                         |                                 |         |         |                                |          |         |
| Small                                                            | 1 [Reference]                   | NA      | NA      | 1 [Reference]                  | NA       | NA      |
| Medium                                                           | 1.01 (0.77-1.33)                | 0.01    | .93     | 0.98 (0.91-1.06)               | -0.02    | .66     |
| Large                                                            | 0.99 (0.76-1.28)                | -0.01   | .91     | 0.97 (0.90-1.05)               | -0.03    | .41     |
| <b>Health region</b>                                             |                                 |         |         |                                |          |         |
| Winnipeg Regional Health Authority                               | 1 [Reference]                   | NA      | NA      | 1 [Reference]                  | NA       | NA      |
| Alberta Health Edmonton zone                                     | 0.98 (0.74-1.28)                | -0.02   | .86     | 0.95 (0.87-1.03)               | -0.05    | .24     |
| Alberta Health Calgary zone                                      | 1.09 (0.81-1.46)                | 0.08    | .57     | 0.93 (0.85-1.02)               | -0.07    | .14     |
| BC Fraser Health Authority                                       | 0.79 (0.62-1.02)                | -0.23   | .07     | 0.94 (0.87-1.02)               | -0.06    | .12     |
| BC Interior Health Authority                                     | 1.03 (0.65-1.63)                | 0.03    | .89     | 0.92 (0.81-1.05)               | -0.08    | .21     |
| <b>Random intercept for unit clustering</b>                      | 1.00 (0.90-1.12)                | 0.004   | .94     | 1.01 (1.00-1.02)               | 0.01     | .01     |

Abbreviations: ACT, the Alberta Context Tool; OR, odds ratio; NA, not applicable; RR, relative rate; MBI, Maslach Burnout Inventory; BC, British Columbia.

<sup>a</sup> Models the likelihood of 0 missed or rushed care.

<sup>b</sup> Compares numbers of missed or rushed care tasks among individuals with at least 1 missed or rushed care task.
